# Supplementary material
Source: publisher figshare collection journal article supplement (https://acs.figshare.com/ndownloader/files/3820867)
Supplement: Supplementary file 1 [file 3820867]

# Supporting Information

## Design, synthesis and biological evaluation of novel matrix metalloproteinase inhibitors as potent antihemorrhagic agents: from hit identification to an optimized lead.

Josune Orbe,<sup>1</sup> Juan A. Sánchez,<sup>2</sup> Obdulia Rabal,<sup>2</sup> José A. Rodríguez,<sup>1</sup> Agustina Salicio,<sup>1</sup> Ana Ugarte,<sup>2</sup> Miriam Belzunce,<sup>1</sup> Musheng Xu,<sup>4</sup> Wei Wu,<sup>4</sup> Haizhong Tan,<sup>4</sup> Hongyu Ma,<sup>4</sup> José A. Páramo,<sup>1,3,\*</sup> and Julen Oyarzabal<sup>2,\*</sup>

### Table of Contents

|                                                                                 |     |
|---------------------------------------------------------------------------------|-----|
| <b>S1.</b> Protocol for Prep-HPLC purification method.....                      | S2  |
| <b>S2.</b> Protocol for SFC purification method.....                            | S2  |
| <b>S3.</b> Details for Optical Rotation.....                                    | S2  |
| <b>S4.</b> Table S1. Selectivity profile 10 $\mu$ M against different MMPs..... | S3  |
| <b>S5.</b> Synthesis of benzyl 4-chlorocarbonyl benzoate ( <b>Int. 1</b> )..... | S3  |
| <b>S6.</b> HPLC purities of final compounds.....                                | S3  |
| <b>S7.</b> HPLC traces for final compounds.....                                 | S5  |
| <b>S8.</b> Synthesis of compound <b>23b</b> .....                               | S20 |
| <b>S9.</b> X-ray crystallographic data of compound <b>23b</b> .....             | S21 |

### Protocol for Prep-HPLC purification method:

The HPLC measurement was performed using Gilson 281 from 233 pump (binary), an autosampler, and a UV detector. The fractions were detected by LC-MS. The MS detector was configured with an electrospray ionization source. The source temperature was maintained at 300-350 °C. Reverse phase HPLC was carried out on Luna C18 (100×30 mm; 4 or 5  $\mu$ m). Solvent A: water with 0.075% trifluoroacetic acid; Solvent B: acetonitrile with 0.075% trifluoroacetic acid. Gradient: At room temperature, 20% of B to 40% of B within 6 min at 25 mL/min; then 40% B at 25 mL/min over 2 min, UV detector.

### Protocol for SFC purification method:

#### Analytical separation method:

Analytical separations were performed using a Thar analytical SFC with a ChiralPak AD-H column (250 x 4.6 mm). Solvent A: CO<sub>2</sub>; Solvent B: methanol with 0.05% DEA. Mobile phase: 50% of A and 50% of B at 2.0 mL/min. Back pressure: 100 bar; and column temperature: 35 °C. UV detector at 220 nm.

#### Preparative separation method:

Preparative separation was performed using a Mg II preparative SFC with a ChiralPak AD-H column (250 x 30 mm). Solvent A: CO<sub>2</sub>; Solvent B: ethanol with 0.1% NH<sub>3</sub>·H<sub>2</sub>O. Mobile phase 50% of A and 50% of B at 40 mL/min. Back pressure: 100 bar; and column temperature: 38 °C. UV detector at 220 nm.

Samples were prepared by dissolving in methanol to ~12 mg/ml and 2.0 mL were used per injection. After separation, the fractions were dried off via rotary evaporation (bath temperature 40 °C) to get the desired isomers. Purity was tested via LCMS.

### Details for Optical Rotation of compounds 5 and 22:

Optical rotation was measured with an AUTOPOL V polarimeter at room temperature and with a wavelength of 589 nm.

#### Compound 5

C = 0.9762 g/100ml diluted with methanol

L = 1 dm

$\alpha_1 = + 0.163$ ;  $\alpha_2 = + 0.162$ ;  $\alpha_3 = + 0.163$ ;  $\bar{\alpha} = + 0.163$ ; RSD = 0.35%;

$[\alpha]_D^{20} = + 16.66^\circ \pm 0.06^\circ$

#### Compound 22

C = 0.9668 g/100ml diluted with methanol

L = 1 dm

$\alpha_1 = - 0.166$ ;  $\alpha_2 = - 0.165$ ;  $\alpha_3 = - 0.165$ ;  $\bar{\alpha} = - 0.165$ ; RSD = 0.35%;

$[\alpha]_D^{20} = - 17.10^\circ \pm 0.06^\circ$

**Table S1. Selectivity profile, % inhibition, at 10  $\mu$ M against different MMPs**

| Cpd        | MMP1  | MMP2   | MMP7  | MMP8   | MMP9   | MMP12  | MMP13 | MMP14  | MMP20 |
|------------|-------|--------|-------|--------|--------|--------|-------|--------|-------|
| <b>13</b>  | 90.37 | 101.14 | 59.67 | 101.34 | 99.92  | 104.89 | 100   | 100.2  | N/D   |
| <b>16</b>  | 85.11 | 124.81 | 56.48 | 102.31 | 101.56 | 101.57 | N/D   | 100.37 | N/D   |
| <b>19d</b> | 86.1  | 100.65 | 65.59 | 99.82  | 102.15 | 99.67  | N/D   | 92.48  | N/D   |
| <b>19p</b> | 9     | 100.69 | 26.55 | 96.52  | 98.07  | 100.03 | N/D   | 55.78  | N/D   |
| <b>20a</b> | N/D   | 100    | N/D   | N/D    | 100    | N/D    | 100   | N/D    | N/D   |

### Synthesis of benzyl 4-chlorocarbonyl benzoate (**Int. 1**)

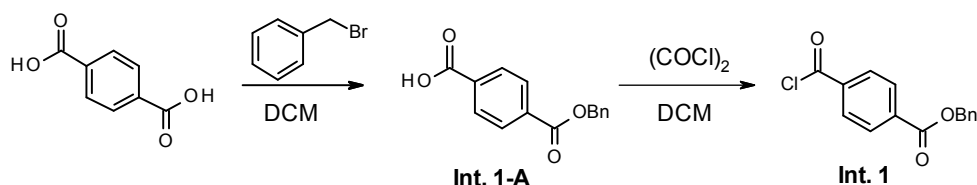

To a solution of commercially available terephthalic acid (10 g, 0.06 mol) in DCM (100 mL) was added  $\text{Et}_3\text{N}$  (12.12 g, 2 eq). Then bromide (9.27 g, 0.9 eq) in DCM (20 mL) was added dropwise at room temperature. The resulting mixture was stirred at room temperature for 3 h until TLC (PE:AE=1:1) detected the most starting material was consumed, then concentrated and the mixture was extracted with EtOAc, washed with brine, dried over anhydrous  $\text{Na}_2\text{SO}_4$  and concentrated to give the crude compound which was chromatographed on silica gel to give pure compound **Int.1-A** (2.2 g, 14%) as a white solid. MS  $m/z$  257  $[\text{M} + \text{H}]^+$  calc. for  $\text{C}_{15}\text{H}_{12}\text{O}_4$ .

To the solution of **Int.1-A** (800 mg, 3.13 mmol) in DCM (20 mL) and DMF (cat.) was added oxalyl dichloride (788 mg, 2 eq) at 0-5  $^\circ\text{C}$  and the reaction was stirred at RT for 2 h. Then the mixture was concentrated to give the crude product **Int.1** (860 mg) which was used for the next step directly. MS  $m/z$  275  $[\text{M} + \text{H}]^+$  calc. for  $\text{C}_{15}\text{H}_{11}\text{ClO}_3$ .

### HPLC purities of final compounds

HPLC-analysis was performed using a Shimadzu LC-20AB or LC-20AD with a Luna-C18(2), 5 $\mu$ m, 2.0\*50mm column at 40  $^\circ\text{C}$  and UV detection. Three different methods were used.

#### Method 1

Solvent A: water with 0.056% trifluoroacetic acid; Solvent B: acetonitrile with 0.056% trifluoroacetic acid. Gradient: After 0.1 minutes at the initial condition of 90% A and 10% B, solvent B was increased to 80% over 4 minutes, maintained at 80% for 0.9 minutes, then a linear gradient to initial conditions was applied for 0.02 minutes and maintained for 0.58 minutes to re-equilibrate the column, giving a cycle time of 5.50 minutes. Flow rate was 0.8 mL/min from 0.01 to 4.90 minutes, increased to 1.2 mL/min in 0.03 minutes and maintained until the end of the run.

#### Method 2

Solvent A: water with 0.056% trifluoroacetic acid; Solvent B: acetonitrile with 0.056% trifluoroacetic acid. Gradient: After 0.4 minutes at the initial condition of 100% A, solvent B was increased to 60% over 4 minutes, maintained at 60% for 0.8 minutes, then a linear gradient to initial conditions was applied for 0.02 minutes and maintained for 0.68 minutes to re-equilibrate the column, giving a cycle time of 5.90 minutes. Flow rate was 0.8 mL/min from 0.01 to 5.21 minutes, increased to 1.2 mL/min in 0.02 minutes and maintained until the end of the run.

#### Method 3

Solvent A: water with 0.037% trifluoroacetic acid; Solvent B: acetonitrile with 0.019% trifluoroacetic acid. Gradient: After 0.1 minutes at the initial condition of 100% A, solvent B was increased to 60% over 4 minutes, maintained at 60% for 2 minutes, then a linear gradient to initial conditions was applied for 0.01 minutes and maintained for 1.79 minutes to re-equilibrate the column, giving a cycle time of 7.80 min. Flow rate was 3 mL/min.

#### Method 4

Solvent A: water with 0.056% trifluoroacetic acid; Solvent B: acetonitrile with 0.019% trifluoroacetic acid. Gradient: After 0.1 minutes at the initial condition of 90% A and 10% B, solvent B was increased to 80% over 4 minutes, maintained at 80% for 2 minutes, then a linear gradient to initial conditions was applied for 0.01 minutes and maintained for 0.68 minutes to re-equilibrate the column, giving a cycle time of 7.80 minutes. Flow rate was 3 mL/min.

### **HPLC purities of final compounds**

| Compound   | Method | Rt   | Purity (%) |
|------------|--------|------|------------|
| <b>11</b>  | 3      | 2.38 | 99.53      |
| <b>12</b>  | 1      | 2.56 | 98.38      |
| <b>13</b>  | 4      | 2.70 | 99.36      |
| <b>14</b>  | 1      | 2.18 | 96.97      |
| <b>15</b>  | 1      | 2.31 | 97.88      |
| <b>16</b>  | 3      | 3.90 | 98.96      |
| <b>17</b>  | 1      | 3.30 | 97.98      |
| <b>18</b>  | 1      | 2.58 | 95.33      |
| <b>19a</b> | 3      | 3.53 | 97.68      |
| <b>19b</b> | 4      | 3.30 | 99.74      |
| <b>19c</b> | 1      | 2.37 | 99.38      |
| <b>19d</b> | 3      | 3.04 | 98.23      |
| <b>19e</b> | 3      | 3.28 | 95.46      |
| <b>19f</b> | 3      | 2.58 | 95.31      |
| <b>19g</b> | 3      | 3.23 | 98.50      |
| <b>19h</b> | 3      | 3.44 | 98.01      |
| <b>19i</b> | 3      | 3.31 | 98.35      |

|            |   |      |       |
|------------|---|------|-------|
| <b>19j</b> | 2 | 2.82 | 96.13 |
| <b>19k</b> | 2 | 3.41 | 99.63 |
| <b>19l</b> | 1 | 2.69 | 97.88 |
| <b>19m</b> | 3 | 3.50 | 98.88 |
| <b>19n</b> | 1 | 1.98 | 97.99 |
| <b>19o</b> | 3 | 2.50 | 98.14 |
| <b>19p</b> | 1 | 3.51 | 100   |
| <b>20a</b> | 4 | 2.66 | 95.45 |
| <b>20b</b> | 4 | 2.96 | 96.71 |
| <b>20c</b> | 4 | 3.21 | 99.09 |
| <b>21a</b> | 4 | 2.71 | 99.59 |
| <b>21b</b> | 2 | 2.79 | 96.16 |
| <b>22</b>  | 1 | 1.61 | 99.46 |

## HPLC traces for final compounds

### Compound 11

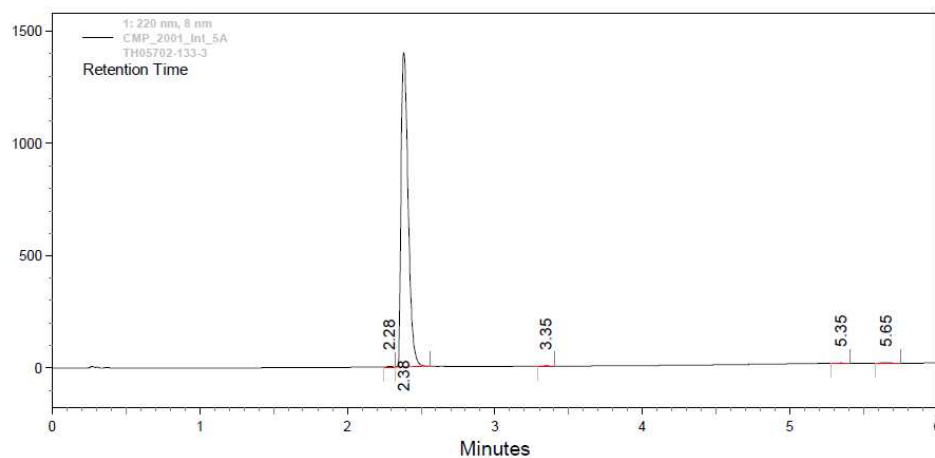

| <i>Retention Time</i> | <i>Height</i> | <i>Area</i> | <i>Area Percent</i> |
|-----------------------|---------------|-------------|---------------------|
| 2.28                  | 2151          | 4456        | 0.10                |
| 2.38                  | 1387223       | 4644288     | 99.53               |
| 3.35                  | 1530          | 5109        | 0.11                |
| 5.35                  | 1497          | 4427        | 0.09                |
| 5.65                  | 2029          | 7734        | 0.17                |

## Compound 12

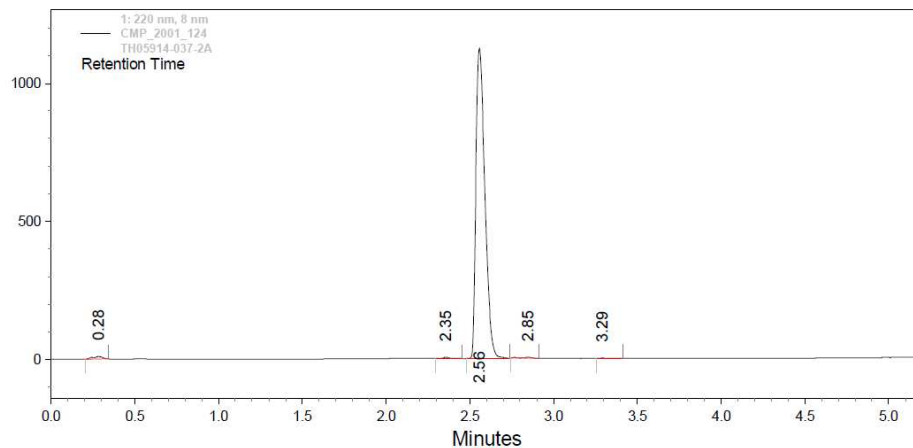

1: 220 nm, 8 nm

| <i>Retention Time</i> | <i>Height</i> | <i>Area</i> | <i>Area Percent</i> |
|-----------------------|---------------|-------------|---------------------|
| 0.28                  | 9036          | 37639       | 0.89                |
| 2.35                  | 3961          | 11335       | 0.27                |
| 2.56                  | 1119814       | 4183114     | 98.38               |
| 2.85                  | 2747          | 12101       | 0.28                |
| 3.29                  | 1866          | 7961        | 0.19                |

## Compound 13

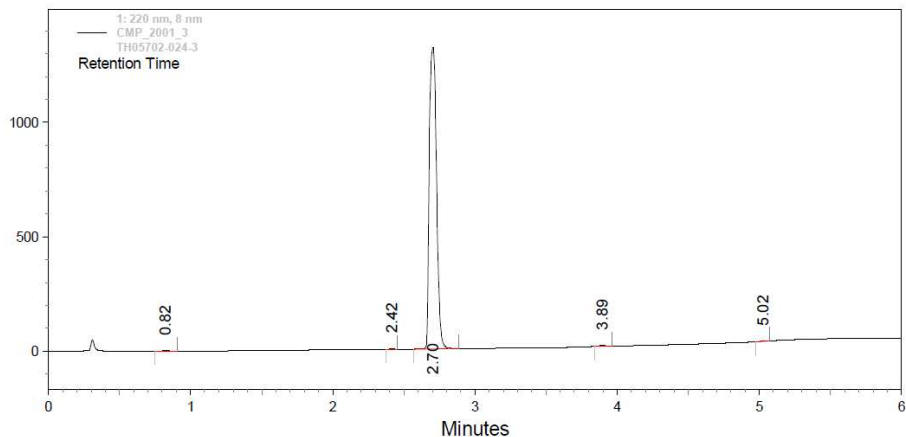

1: 220 nm, 8 nm

| <i>Retention Time</i> | <i>Height</i> | <i>Area</i> | <i>Area Percent</i> |
|-----------------------|---------------|-------------|---------------------|
| 0.82                  | 1772          | 5072        | 0.11                |
| 2.42                  | 2306          | 4616        | 0.10                |
| 2.70                  | 1311447       | 4653083     | 99.36               |
| 3.89                  | 5885          | 14987       | 0.32                |
| 5.02                  | 1898          | 5335        | 0.11                |

## Compound 14

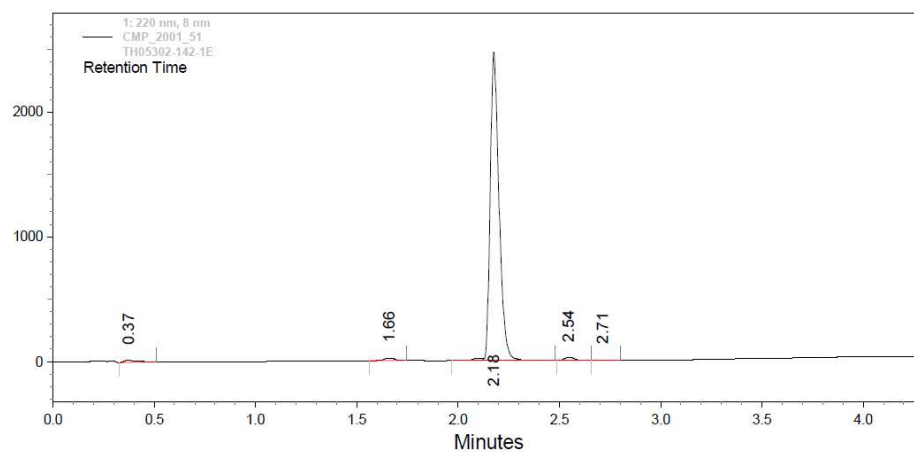

1: 220 nm, 8 nm

| Retention Time | Height  | Area    | Area Percent |
|----------------|---------|---------|--------------|
| 0.37           | 18071   | 79122   | 1.03         |
| 1.66           | 17721   | 61625   | 0.80         |
| 2.18           | 2416166 | 7474709 | 96.97        |
| 2.54           | 22829   | 75925   | 0.98         |
| 2.71           | 4532    | 16876   | 0.22         |

## Compound 15

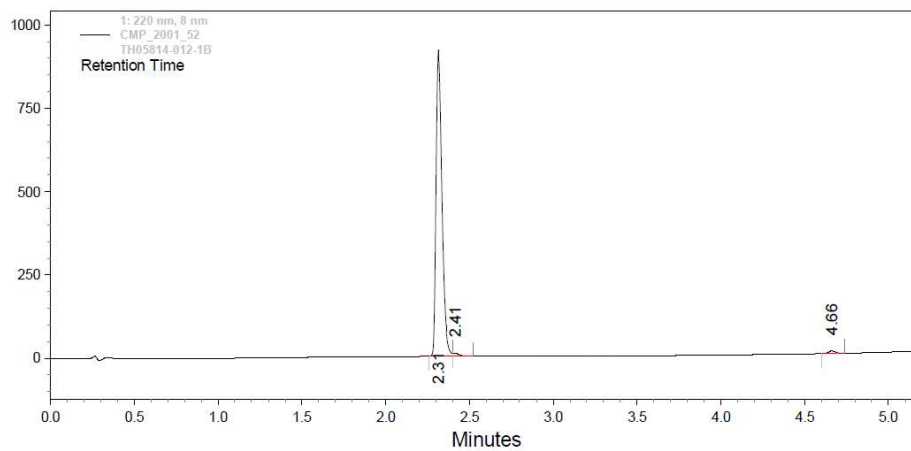

1: 220 nm, 8 nm

| Retention Time | Height | Area    | Area Percent |
|----------------|--------|---------|--------------|
| 2.31           | 907927 | 2273490 | 97.88        |
| 2.41           | 9294   | 25303   | 1.09         |
| 4.66           | 8184   | 23962   | 1.03         |

## Compound 16

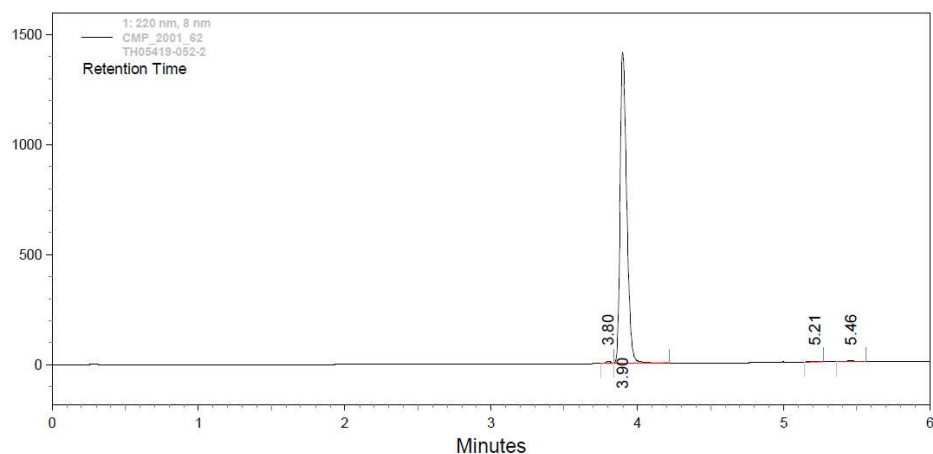

1: 220 nm, 8 nm

| Retention Time | Height  | Area    | Area Percent |
|----------------|---------|---------|--------------|
| 3.80           | 8198    | 21976   | 0.49         |
| 3.90           | 1397215 | 4438032 | 98.96        |
| 5.21           | 2179    | 6477    | 0.14         |
| 5.46           | 4427    | 18278   | 0.41         |

## Compound 17

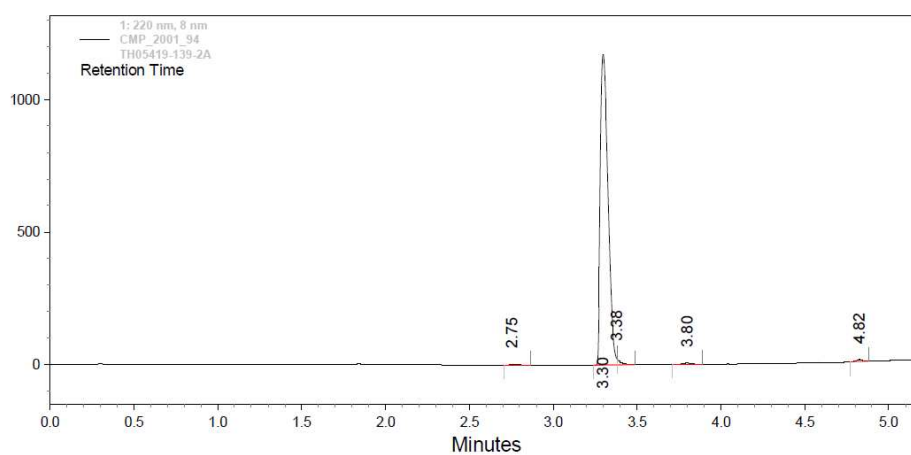

1: 220 nm, 8 nm

| Retention Time | Height  | Area    | Area Percent |
|----------------|---------|---------|--------------|
| 2.75           | 3993    | 12801   | 0.33         |
| 3.30           | 1155309 | 3768700 | 97.98        |
| 3.38           | 21920   | 28444   | 0.74         |
| 3.80           | 5390    | 18190   | 0.47         |
| 4.82           | 7326    | 18168   | 0.47         |



## Compound 18

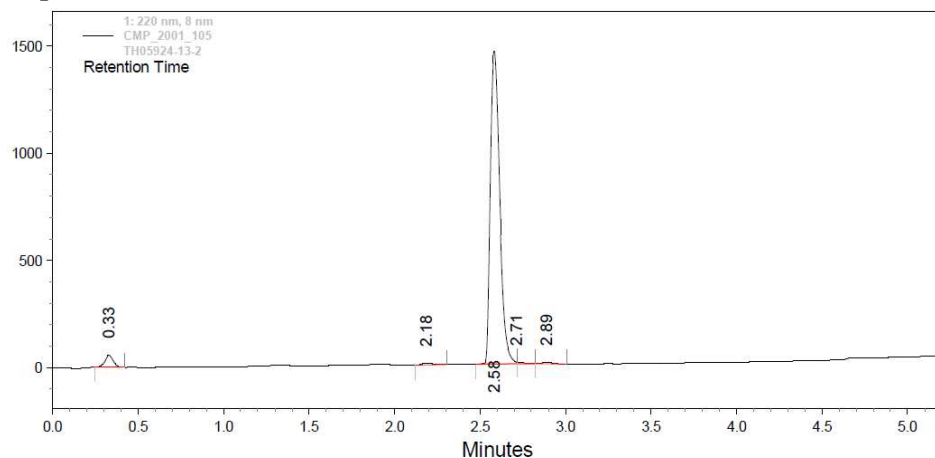

1: 220 nm, 8 nm

| Retention Time | Height  | Area    | Area Percent |
|----------------|---------|---------|--------------|
| 0.33           | 54806   | 184568  | 3.17         |
| 2.18           | 9637    | 37987   | 0.65         |
| 2.58           | 1423241 | 5553713 | 95.33        |
| 2.71           | 7322    | 18007   | 0.31         |
| 2.89           | 8881    | 31711   | 0.54         |

## Compound 19a

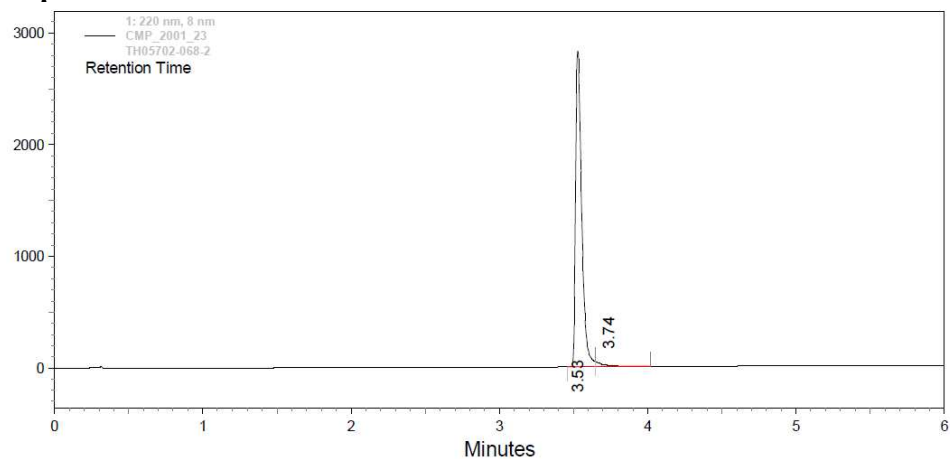

1: 220 nm, 8 nm

| Retention Time | Height  | Area    | Area Percent |
|----------------|---------|---------|--------------|
| 3.53           | 2756139 | 8066475 | 97.68        |
| 3.74           | 12803   | 191241  | 2.32         |

## Compound 19b

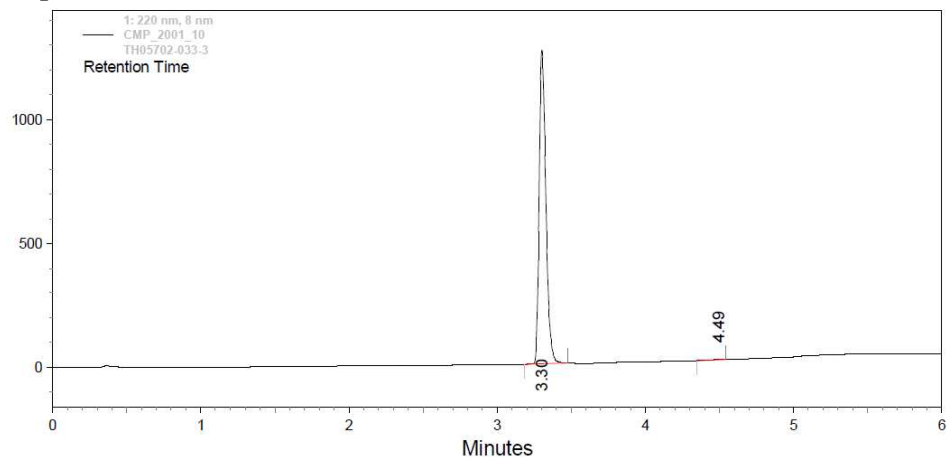

1: 220 nm, 8 nm

| Retention Time | Height  | Area    | Area Percent |
|----------------|---------|---------|--------------|
| 3.30           | 1259450 | 3976292 | 99.74        |
| 4.49           | 2864    | 10398   | 0.26         |

OPERATOR :

## Compound 19c

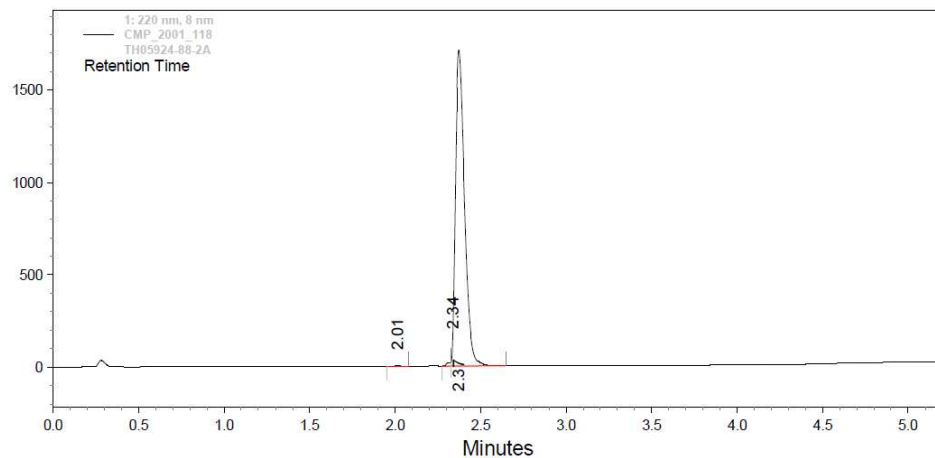

1: 220 nm, 8 nm

| Retention Time | Height  | Area    | Area Percent |
|----------------|---------|---------|--------------|
| 2.01           | 2762    | 7111    | 0.11         |
| 2.34           | 322556  | 31996   | 0.51         |
| 2.37           | 1616136 | 6273465 | 99.38        |

OPERATOR :

## Compound 19d

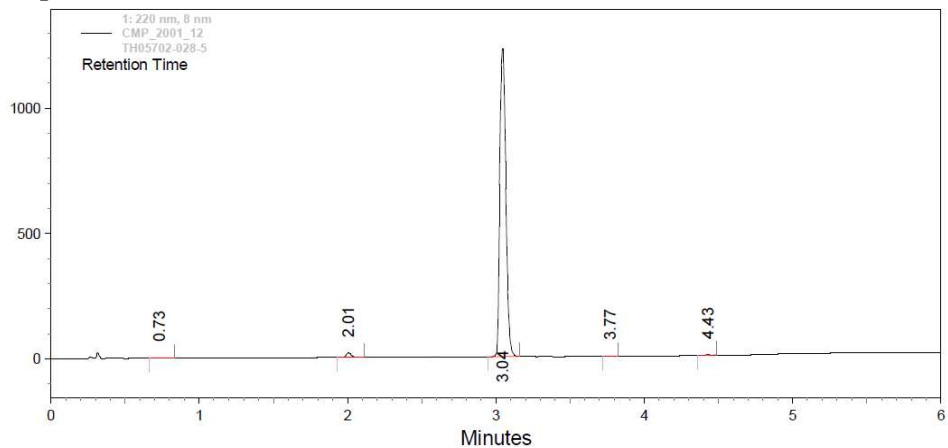

1: 220 nm, 8 nm

| Retention Time | Height  | Area    | Area Percent |
|----------------|---------|---------|--------------|
| 0.73           | 2682    | 9227    | 0.26         |
| 2.01           | 17306   | 42971   | 1.21         |
| 3.04           | 1225413 | 3494283 | 98.23        |
| 3.77           | 1350    | 3700    | 0.10         |
| 4.43           | 2773    | 7185    | 0.20         |

## Compound 19e

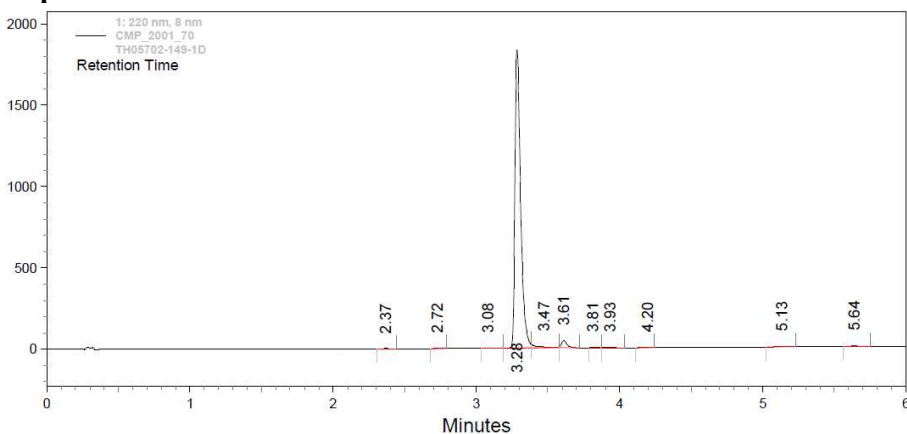

1: 220 nm, 8 nm

| Retention Time | Height  | Area    | Area Percent |
|----------------|---------|---------|--------------|
| 2.37           | 2208    | 5532    | 0.11         |
| 2.72           | 3053    | 7492    | 0.14         |
| 3.08           | 2256    | 7608    | 0.14         |
| 3.28           | 1819825 | 5027596 | 95.46        |
| 3.47           | 5322    | 55662   | 1.06         |
| 3.61           | 39467   | 109407  | 2.08         |
| 3.81           | 2156    | 4917    | 0.09         |
| 3.93           | 3938    | 13075   | 0.25         |
| 4.20           | 3303    | 9218    | 0.18         |
| 5.13           | 2204    | 9773    | 0.19         |
| 5.64           | 4685    | 16596   | 0.32         |

## Compound 19f

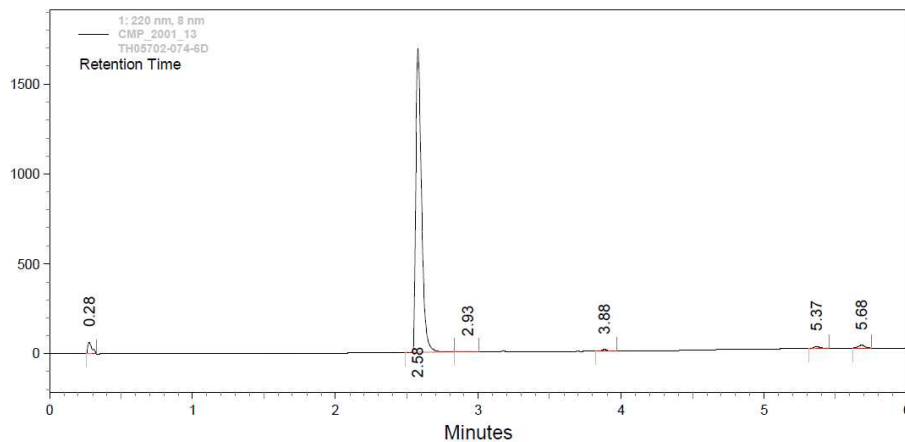

1: 220 nm, 8 nm

| Retention Time | Height  | Area    | Area Percent |
|----------------|---------|---------|--------------|
| 0.28           | 50293   | 121354  | 2.43         |
| 2.58           | 1653786 | 4753557 | 95.31        |
| 2.93           | 1963    | 10076   | 0.20         |
| 3.88           | 7598    | 20438   | 0.41         |
| 5.37           | 11352   | 33939   | 0.68         |
| 5.68           | 14185   | 48035   | 0.96         |

## Compound 19g

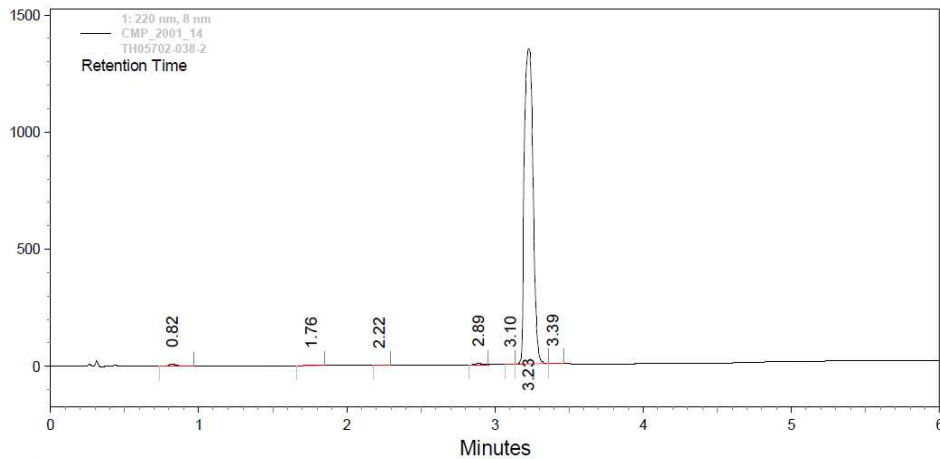

1: 220 nm, 8 nm

| Retention Time | Height  | Area    | Area Percent |
|----------------|---------|---------|--------------|
| 0.82           | 11084   | 41576   | 0.76         |
| 1.76           | 2692    | 9518    | 0.17         |
| 2.22           | 2603    | 7098    | 0.13         |
| 2.89           | 7014    | 16643   | 0.30         |
| 3.10           | 815     | 1858    | 0.03         |
| 3.23           | 1345420 | 5424034 | 98.50        |
| 3.39           | 2918    | 5835    | 0.11         |

## Compound 19h

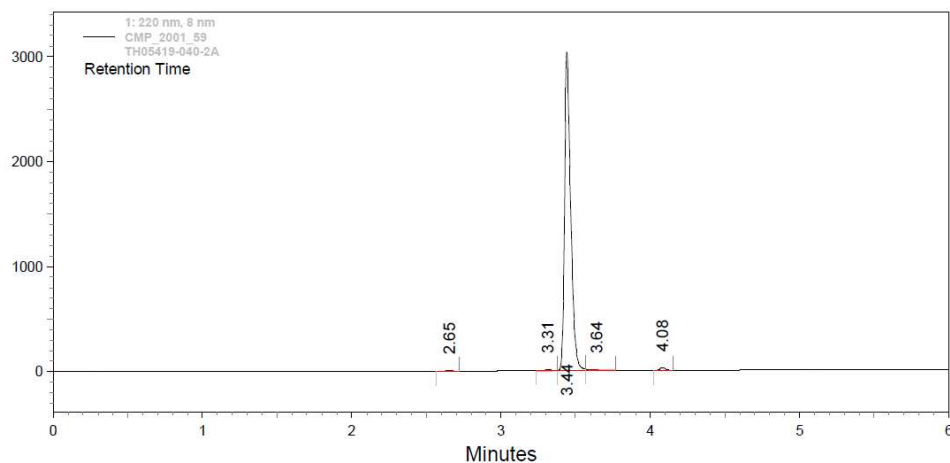

1: 220 nm, 8 nm

| Retention Time | Height  | Area    | Area Percent |
|----------------|---------|---------|--------------|
| 2.65           | 4281    | 12457   | 0.14         |
| 3.31           | 13610   | 42528   | 0.49         |
| 3.44           | 2926534 | 8558841 | 98.01        |
| 3.64           | 5005    | 56175   | 0.64         |
| 4.08           | 23601   | 62458   | 0.72         |

## Compound 19i

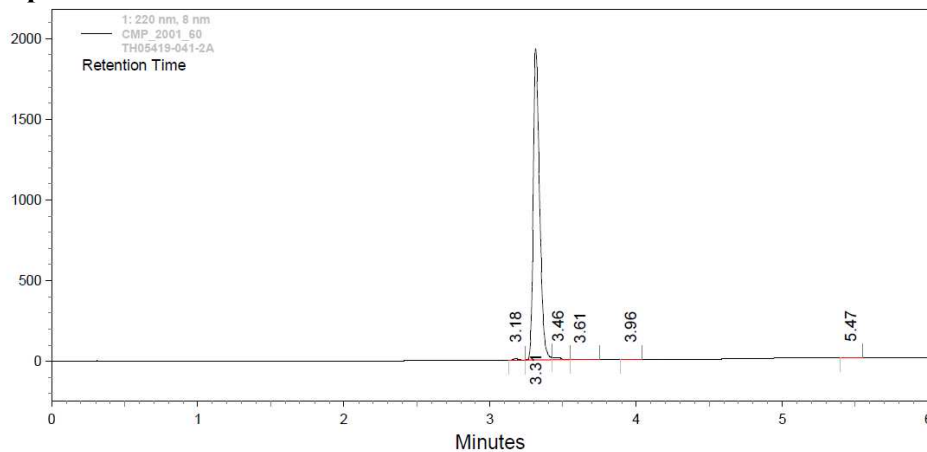

1: 220 nm, 8 nm

| Retention Time | Height  | Area    | Area Percent |
|----------------|---------|---------|--------------|
| 3.18           | 9706    | 24274   | 0.41         |
| 3.31           | 1869266 | 5770800 | 98.35        |
| 3.46           | 12172   | 47956   | 0.82         |
| 3.61           | 1465    | 5944    | 0.10         |
| 3.96           | 4231    | 12703   | 0.22         |
| 5.47           | 1434    | 5666    | 0.10         |

## Compound 19j

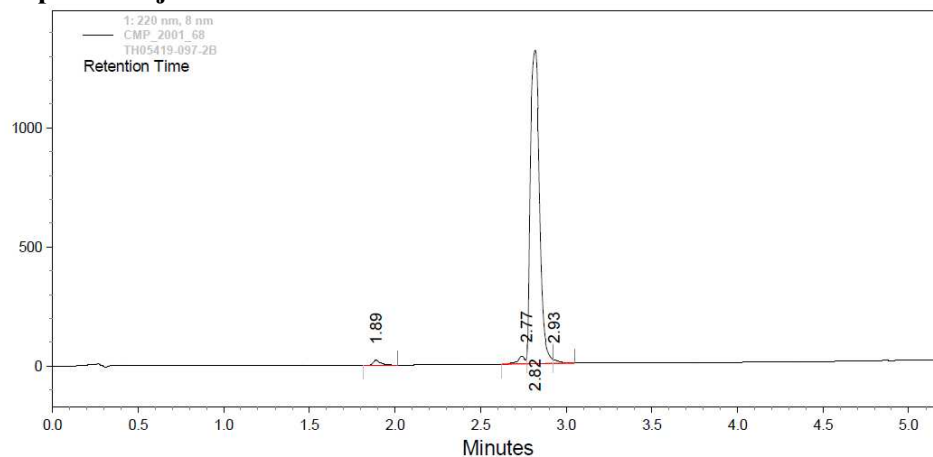

1: 220 nm, 8 nm

| Retention Time | Height  | Area    | Area Percent |
|----------------|---------|---------|--------------|
| 1.89           | 19658   | 59812   | 1.17         |
| 2.77           | 72141   | 94405   | 1.84         |
| 2.82           | 1310362 | 4923237 | 96.13        |
| 2.93           | 14962   | 44026   | 0.86         |

## Compound 19k

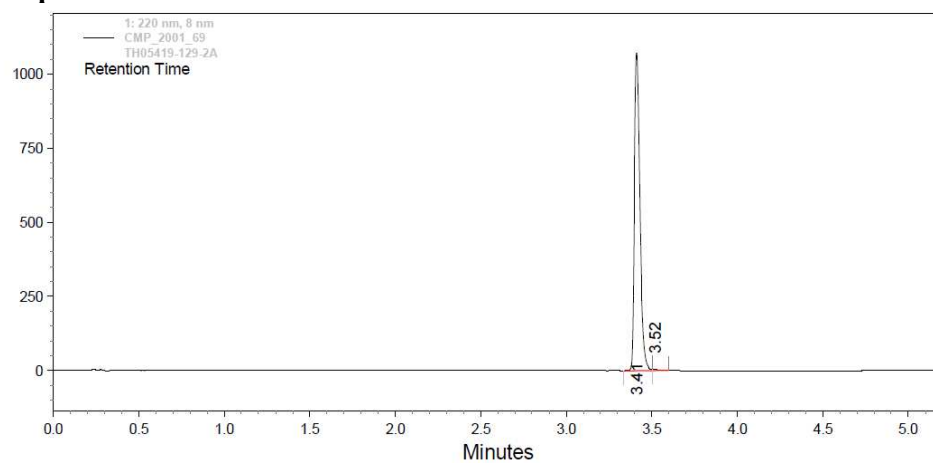

1: 220 nm, 8 nm

| Retention Time | Height  | Area    | Area Percent |
|----------------|---------|---------|--------------|
| 3.41           | 1059247 | 2407045 | 99.63        |
| 3.52           | 3363    | 8855    | 0.37         |

OPERATOR -

## Compound 19l

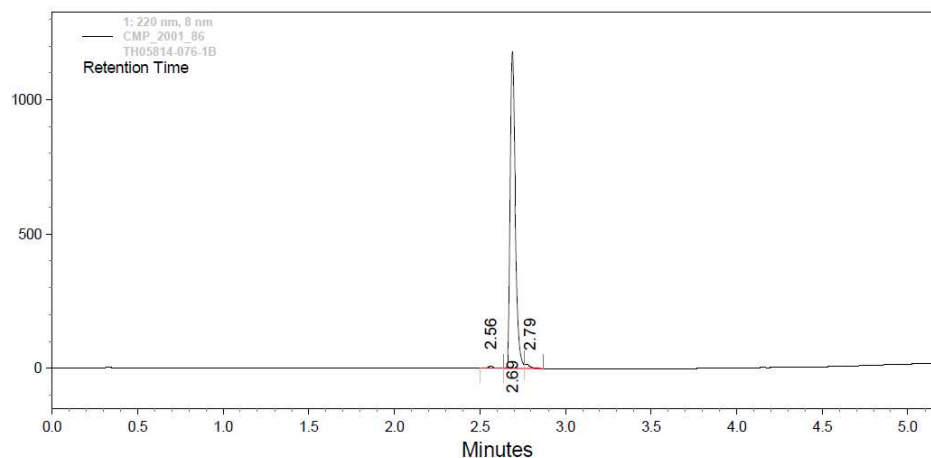

1: 220 nm, 8 nm

| Retention Time | Height  | Area    | Area Percent |
|----------------|---------|---------|--------------|
| 2.56           | 7783    | 19130   | 0.77         |
| 2.69           | 1127819 | 2429308 | 97.88        |
| 2.79           | 5947    | 33415   | 1.35         |

## Compound 19m

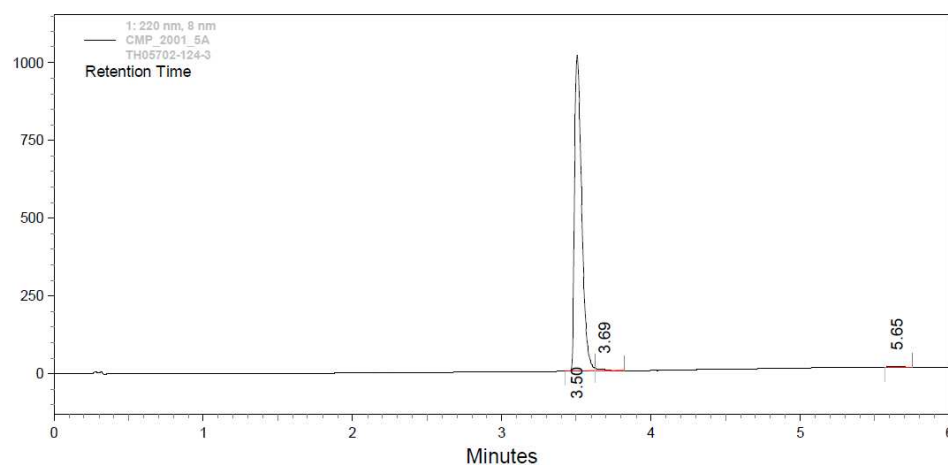

1: 220 nm, 8 nm

| Retention Time | Height | Area    | Area Percent |
|----------------|--------|---------|--------------|
| 3.50           | 999780 | 3373596 | 98.88        |
| 3.69           | 3254   | 27330   | 0.80         |
| 5.65           | 2930   | 10874   | 0.32         |

# Compound 19n

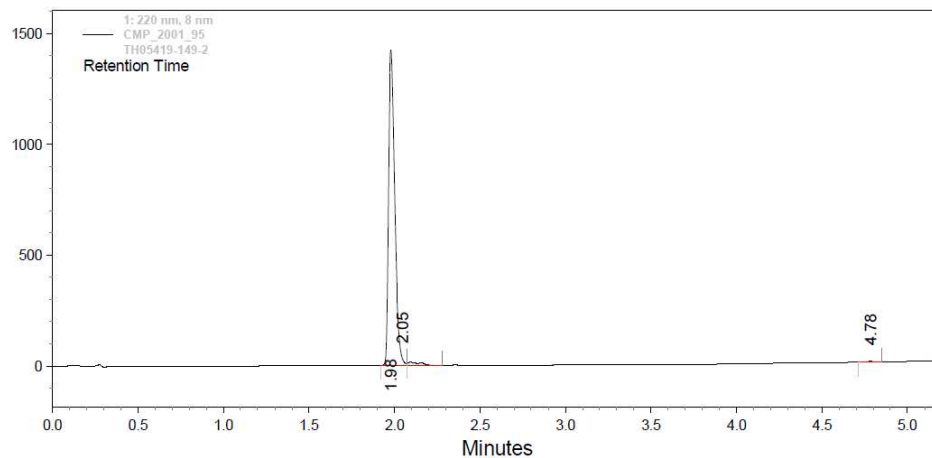

1: 220 nm, 8 nm

| Retention Time | Height  | Area    | Area Percent |
|----------------|---------|---------|--------------|
| 1.98           | 1408143 | 3594339 | 97.99        |
| 2.05           | 17232   | 64895   | 1.77         |
| 4.78           | 3067    | 9007    | 0.25         |

# Compound 19o

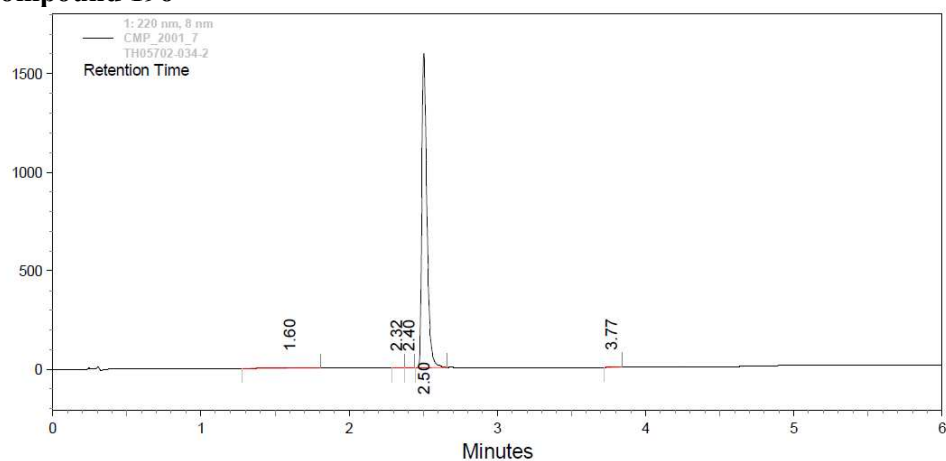

1: 220 nm, 8 nm

| Retention Time | Height  | Area    | Area Percent |
|----------------|---------|---------|--------------|
| 1.60           | 4362    | 56279   | 1.45         |
| 2.32           | 909     | 2703    | 0.07         |
| 2.40           | 1523    | 2741    | 0.07         |
| 2.50           | 1555903 | 3805290 | 98.14        |
| 3.77           | 3900    | 10206   | 0.26         |



## Compound 19p

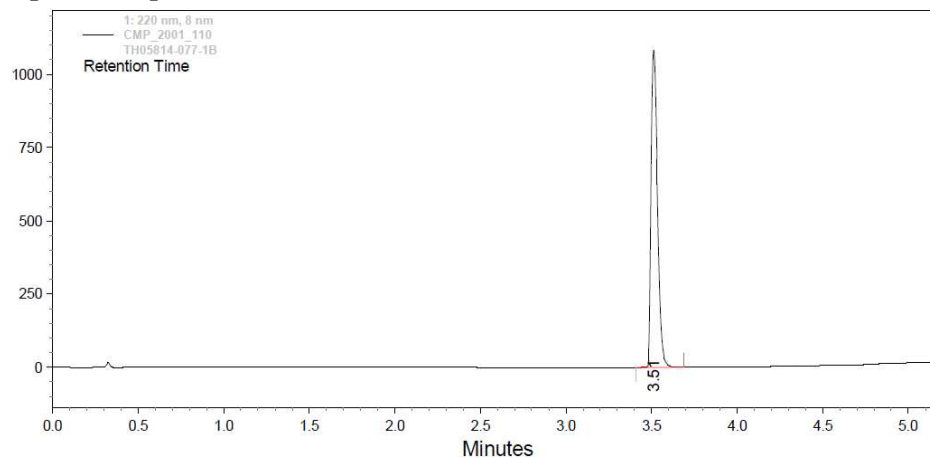

1: 220 nm, 8 nm

| Retention Time | Height  | Area    | Area Percent |
|----------------|---------|---------|--------------|
| 3.51           | 1058522 | 2792921 | 100.00       |

## Compound 20a

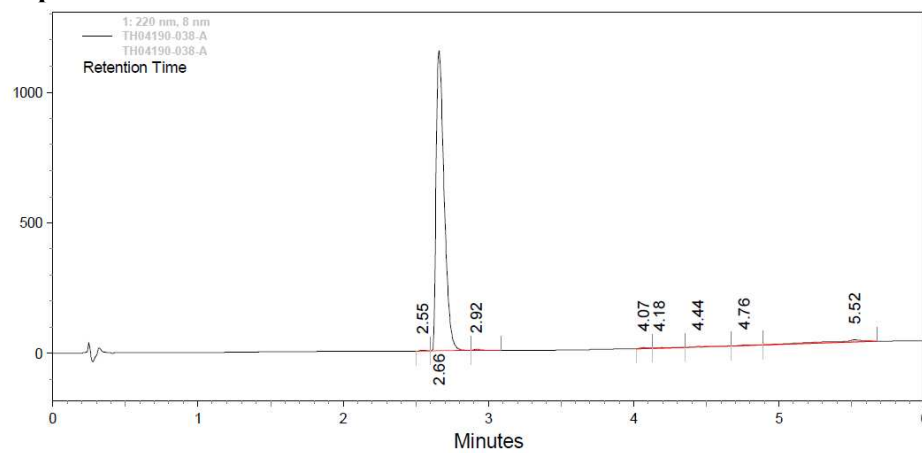

1: 220 nm, 8 nm

| Retention Time | Height  | Area    | Area Percent |
|----------------|---------|---------|--------------|
| 2.55           | 3225    | 8529    | 0.18         |
| 2.66           | 1145745 | 4416883 | 95.45        |
| 2.92           | 4770    | 17847   | 0.39         |
| 4.07           | 3830    | 14497   | 0.31         |
| 4.18           | 1748    | 13377   | 0.29         |
| 4.44           | 1624    | 10097   | 0.22         |
| 4.76           | 1976    | 13714   | 0.30         |
| 5.52           | 7047    | 132430  | 2.86         |

## Compound 20b

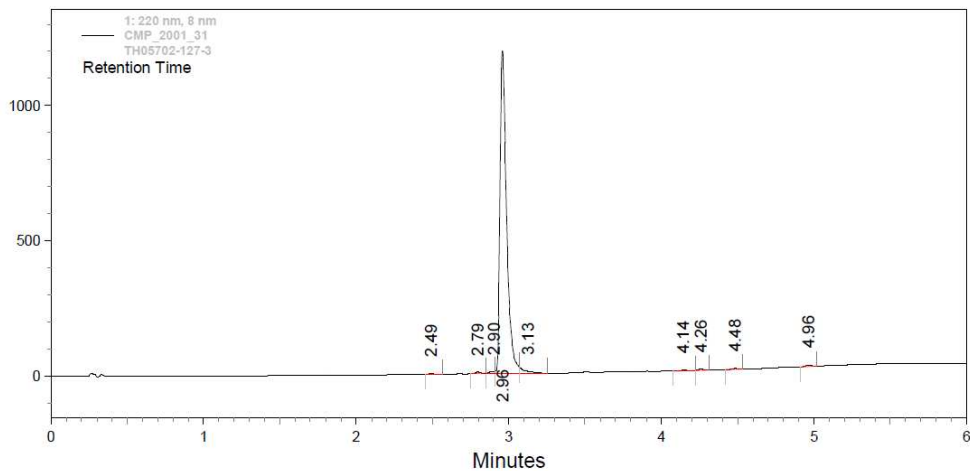

1: 220 nm, 8 nm

| Retention Time | Height  | Area    | Area Percent |
|----------------|---------|---------|--------------|
| 2.49           | 3172    | 6850    | 0.18         |
| 2.79           | 4329    | 11072   | 0.30         |
| 2.90           | 5273    | 11743   | 0.32         |
| 2.96           | 1118856 | 3589961 | 96.71        |
| 3.13           | 5052    | 47269   | 1.27         |
| 4.14           | 2265    | 7259    | 0.20         |
| 4.26           | 5092    | 12388   | 0.33         |
| 4.48           | 3652    | 9455    | 0.25         |
| 4.96           | 6331    | 16001   | 0.43         |

## Compound 20c

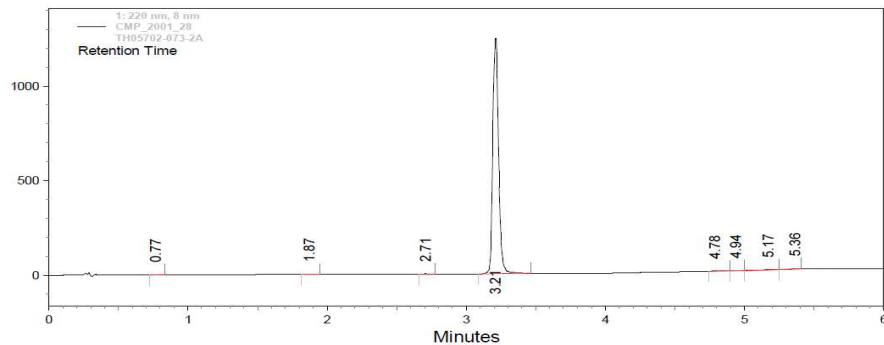

1: 220 nm, 8 nm

| Retention Time | Height  | Area    | Area Percent |
|----------------|---------|---------|--------------|
| 0.77           | 1335    | 3687    | 0.10         |
| 1.87           | 1321    | 4007    | 0.11         |
| 2.71           | 2361    | 4888    | 0.13         |
| 3.21           | 1238508 | 3588542 | 99.09        |
| 4.78           | 771     | 2574    | 0.07         |
| 4.94           | 984     | 2847    | 0.08         |
| 5.17           | 1413    | 7398    | 0.20         |
| 5.36           | 1948    | 7641    | 0.21         |

## Compound 21a

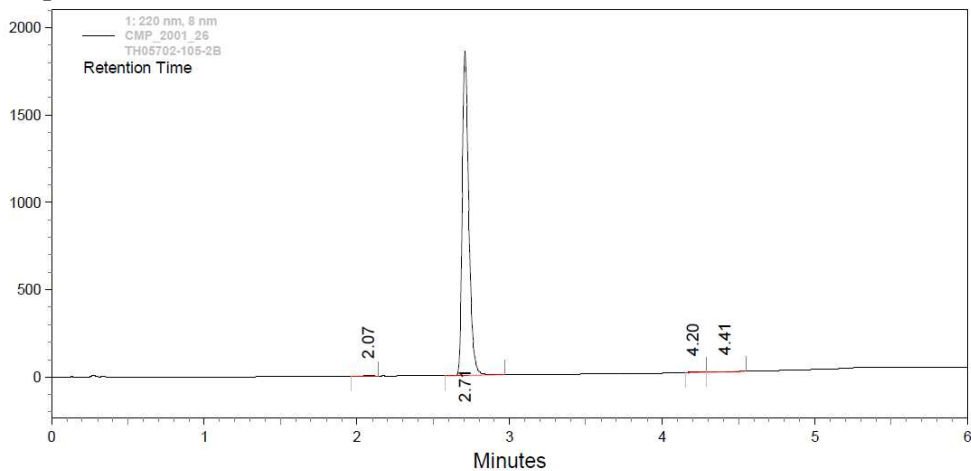

### 1: 220 nm, 8 nm

| Retention Time | Height  | Area    | Area Percent |
|----------------|---------|---------|--------------|
| 2.07           | 4448    | 15492   | 0.28         |
| 2.71           | 1839583 | 5539780 | 99.59        |
| 4.20           | 701     | 2327    | 0.04         |
| 4.41           | 1079    | 5133    | 0.09         |

## Compound 21b

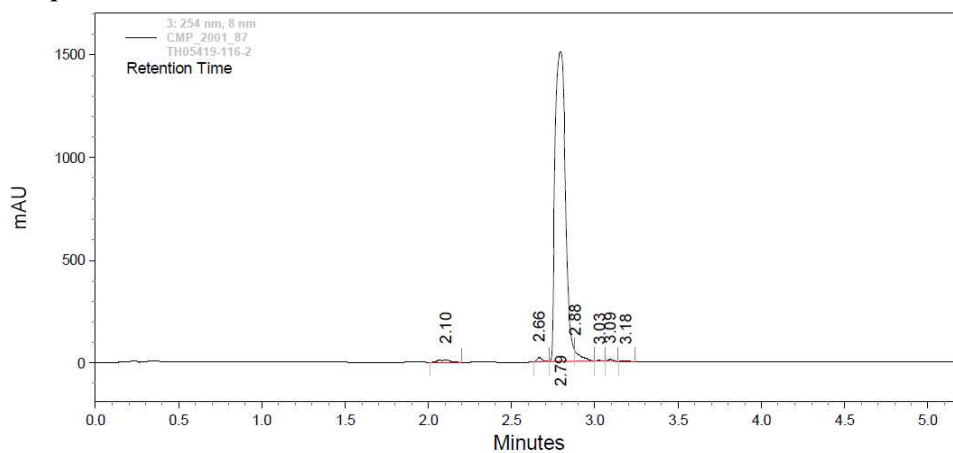

### 3: 254 nm, 8 nm

| Retention Time | Height  | Area    | Area Percent |
|----------------|---------|---------|--------------|
| 2.10           | 13371   | 57640   | 0.86         |
| 2.66           | 19474   | 45756   | 0.68         |
| 2.79           | 1498949 | 6471428 | 96.16        |
| 2.88           | 42065   | 116223  | 1.73         |
| 3.03           | 4091    | 7877    | 0.12         |
| 3.09           | 9621    | 19399   | 0.29         |
| 3.18           | 4351    | 11663   | 0.17         |

## Compound 22

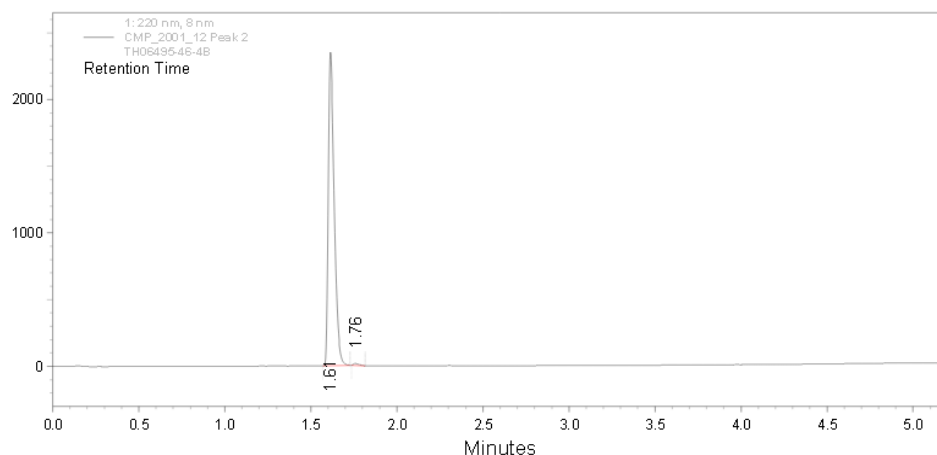

| <i>1: 220 nm, 8 nm</i> |               |             |                     |
|------------------------|---------------|-------------|---------------------|
| <i>Retention Time</i>  | <i>Height</i> | <i>Area</i> | <i>Area Percent</i> |
| 1.61                   | 2322641       | 5618005     | 99.46               |
| 1.76                   | 14640         | 30406       | 0.54                |

## Synthesis of (3*S*)-3-(4-fluorophenyl)sulfonyl-8-azaspiro[4.5]decane-3-carboxylic acid (**23b**)

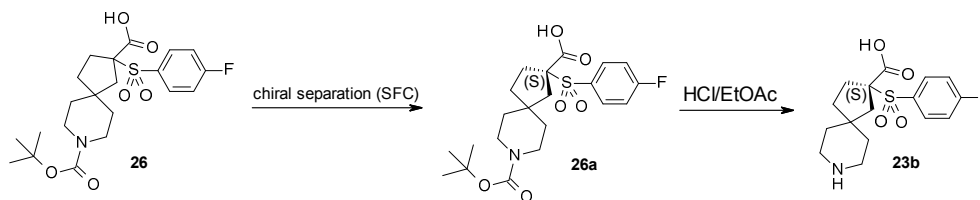

A racemic mixture of compound **26**<sup>1</sup> was first separated by SFC. Then, enantiomerically pure **26a** (60 mg, 0.14 mmol) was dissolved in HCl/EtOAc (2 N, 10 mL) and the mixture was stirred at RT for 1 h. Then, concentrated to give the crude product which was purified by prep-HPLC to obtained pure compound **23b** (30 mg, 59%) as a yellow oil. MS  $m/z$  342  $[M + H]^+$  calc. for  $C_{16}H_{20}FNO_4S$ . <sup>1</sup>H NMR (MeOD, 400 MHz):  $\delta$  7.97-7.94 (m, 2H), 7.38-7.34 (m, 2H), 3.21-3.15 (m, 4H), 2.53-2.50 (m, 2H), 2.45-2.38 (m, 2H), 1.88-1.84 (m, 3H), 1.70-1.67 (m, 3H).

## Protocol for compound **23b** crystallization

We confirm the structure of compound **23b** by X-ray single crystal diffraction analysis. Compound **23b** was dissolved in a three-phase solvent system  $CH_2Cl_2$ /MeOH/THF (10:1:1) and slow evaporation at room temperature for three days led to creation of crystals which were utilized for X-ray diffraction analysis on a rigaku saturn diffractometer using graphic-monochromated Mo  $K\alpha$  radiation ( $\lambda = 0.71073 \text{ \AA}$ ). The structures were solved using the SHELXS program and refined with SHELXL.

### X-ray crystallographic data of compound **23b**

|                              |                                                                                                                      |
|------------------------------|----------------------------------------------------------------------------------------------------------------------|
| Crystal size                 | 0.20×0.18×0.12 mm <sup>3</sup>                                                                                       |
| Radiation type               | Mo K $\alpha$ ( $\lambda$ = 0.71073 Å)                                                                               |
| Space group                  | Orthorhombic / P2(1)2(1)2(1)                                                                                         |
| Cell size                    | a = 7.2894(15) Å<br>b = 11.834(2) Å<br>c = 21.401(4) Å<br>$\alpha$ = 90.00°<br>$\beta$ = 90.00°<br>$\gamma$ = 90.00° |
| Cell volume                  | $V$ = 1846.1(6) Å <sup>3</sup>                                                                                       |
| Cell formula units           | $Z$ = 4                                                                                                              |
| Crystal density              | $D_c$ = 1.359 Mg/m <sup>3</sup>                                                                                      |
| Crystal $F(000)$             | 792.0                                                                                                                |
| Absorpt coefficient $\mu$    | $\mu(\text{Mo K}\alpha)$ = 0.348 mm <sup>-1</sup>                                                                    |
| Limiting indices             | $-7 \leq h \leq 9$<br>$-15 \leq k \leq 15$<br>$-24 \leq l \leq 28$                                                   |
| Cell measurement temperature | $T$ = 293(2) K.                                                                                                      |

### Details for compound **23b** coordinates

Table 1. Crystal data and structure refinement for **23b**

|                                 |                                                                                                                |
|---------------------------------|----------------------------------------------------------------------------------------------------------------|
| Empirical formula               | C16 H21 Cl F N O4 S                                                                                            |
| Formula weight                  | 377.85                                                                                                         |
| Temperature                     | 293(2) K                                                                                                       |
| Wavelength                      | 0.71073 Å                                                                                                      |
| Crystal system, space group     | Orthorhombic, P2(1)2(1)2(1)                                                                                    |
| Unit cell dimensions            | a = 7.2894(15) Å    alpha = 90 deg.<br>b = 11.834(2) Å    beta = 90 deg.<br>c = 21.401(4) Å    gamma = 90 deg. |
| Volume                          | 1846.1(6) Å <sup>3</sup>                                                                                       |
| $Z$ , Calculated density        | 4, 1.359 Mg/m <sup>3</sup>                                                                                     |
| Absorption coefficient          | 0.348 mm <sup>-1</sup>                                                                                         |
| $F(000)$                        | 792                                                                                                            |
| Crystal size                    | 0.20 x 0.18 x 0.12 mm                                                                                          |
| Theta range for data collection | 1.90 to 27.96 deg.                                                                                             |
| Limiting indices                | $-7 \leq h \leq 9$ , $-15 \leq k \leq 15$ , $-24 \leq l \leq 28$                                               |

|                                   |                                             |
|-----------------------------------|---------------------------------------------|
| Reflections collected / unique    | 17535 / 4398 [R(int) = 0.0461]              |
| Completeness to theta = 27.96     | 98.8 %                                      |
| Absorption correction             | Semi-empirical from equivalents             |
| Max. and min. transmission        | 0.9594 and 0.9336                           |
| Refinement method                 | Full-matrix least-squares on F <sup>2</sup> |
| Data / restraints / parameters    | 4398 / 3 / 225                              |
| Goodness-of-fit on F <sup>2</sup> | 1.050                                       |
| Final R indices [I>2sigma(I)]     | R1 = 0.0509, wR2 = 0.1117                   |
| R indices (all data)              | R1 = 0.0645, wR2 = 0.1198                   |
| Absolute structure parameter      | -0.02(8)                                    |
| Extinction coefficient            | 0.025(2)                                    |
| Largest diff. peak and hole       | 0.273 and -0.237 e.A <sup>-3</sup>          |

Table 2. Atomic coordinates ( $\times 10^4$ ) and equivalent isotropic displacement parameters ( $\text{\AA}^2 \times 10^3$ ) for **23b**(eq) is defined as one third of the trace of the orthogonalized  $U_{ij}$  tensor.

|       | x        | y        | z       | U(eq)  |
|-------|----------|----------|---------|--------|
| S(1)  | 9763(1)  | 6512(1)  | 1995(1) | 47(1)  |
| F(1)  | 4549(3)  | 2780(2)  | 1722(1) | 107(1) |
| O(1)  | 12893(3) | 6339(2)  | 668(1)  | 78(1)  |
| O(2)  | 10158(3) | 5511(2)  | 639(1)  | 67(1)  |
| O(3)  | 11425(3) | 6031(2)  | 2248(1) | 58(1)  |
| O(4)  | 8827(3)  | 7373(2)  | 2350(1) | 65(1)  |
| N(1)  | 11794(3) | 11312(2) | 374(1)  | 58(1)  |
| C(1)  | 11310(4) | 6296(2)  | 827(1)  | 48(1)  |
| C(2)  | 10394(4) | 7167(2)  | 1248(1) | 43(1)  |
| C(3)  | 8678(4)  | 7717(2)  | 937(1)  | 51(1)  |
| C(4)  | 8854(4)  | 8979(2)  | 1064(1) | 50(1)  |
| C(5)  | 10943(4) | 9203(2)  | 1051(1) | 42(1)  |
| C(6)  | 11693(4) | 8163(2)  | 1415(1) | 49(1)  |
| C(7)  | 11526(4) | 10293(2) | 1377(1) | 55(1)  |
| C(8)  | 10994(5) | 11352(2) | 1014(2) | 60(1)  |
| C(9)  | 11698(4) | 9226(2)  | 377(1)  | 47(1)  |
| C(10) | 11171(4) | 10288(2) | 26(1)   | 52(1)  |
| C(11) | 8177(4)  | 5398(2)  | 1875(1) | 45(1)  |
| C(12) | 8823(5)  | 4301(2)  | 1803(1) | 53(1)  |
| C(13) | 7578(5)  | 3406(3)  | 1749(2) | 60(1)  |
| C(14) | 5758(5)  | 3654(3)  | 1773(2) | 66(1)  |
| C(15) | 5086(5)  | 4719(3)  | 1857(2) | 78(1)  |
| C(16) | 6319(4)  | 5619(3)  | 1911(2) | 64(1)  |
| Cl(1) | 6149(1)  | 1346(1)  | 262(1)  | 55(1)  |

Table 3. Bond lengths [Å] and angles [deg] for **23b**

---

|                  |            |
|------------------|------------|
| S(1)–O(4)        | 1.443(2)   |
| S(1)–O(3)        | 1.444(2)   |
| S(1)–C(11)       | 1.772(3)   |
| S(1)–C(2)        | 1.836(3)   |
| F(1)–C(14)       | 1.364(4)   |
| O(1)–C(1)        | 1.205(3)   |
| O(2)–C(1)        | 1.316(3)   |
| O(2)–H(2)        | 0.8200     |
| N(1)–C(8)        | 1.490(4)   |
| N(1)–C(10)       | 1.493(4)   |
| N(1)–H(1A)       | 0.916(10)  |
| N(1)–H(1B)       | 0.915(10)  |
| C(1)–C(2)        | 1.522(4)   |
| C(2)–C(6)        | 1.553(4)   |
| C(2)–C(3)        | 1.558(4)   |
| C(3)–C(4)        | 1.523(4)   |
| C(3)–H(3A)       | 0.9700     |
| C(3)–H(3B)       | 0.9700     |
| C(4)–C(5)        | 1.546(4)   |
| C(4)–H(4A)       | 0.9700     |
| C(4)–H(4B)       | 0.9700     |
| C(5)–C(7)        | 1.528(4)   |
| C(5)–C(9)        | 1.542(4)   |
| C(5)–C(6)        | 1.556(4)   |
| C(6)–H(6A)       | 0.9700     |
| C(6)–H(6B)       | 0.9700     |
| C(7)–C(8)        | 1.524(4)   |
| C(7)–H(7A)       | 0.9700     |
| C(7)–H(7B)       | 0.9700     |
| C(8)–H(8A)       | 0.9700     |
| C(8)–H(8B)       | 0.9700     |
| C(9)–C(10)       | 1.515(4)   |
| C(9)–H(9A)       | 0.9700     |
| C(9)–H(9B)       | 0.9700     |
| C(10)–H(10A)     | 0.9700     |
| C(10)–H(10B)     | 0.9700     |
| C(11)–C(16)      | 1.382(4)   |
| C(11)–C(12)      | 1.390(4)   |
| C(12)–C(13)      | 1.399(4)   |
| C(12)–H(12)      | 0.9300     |
| C(13)–C(14)      | 1.360(5)   |
| C(13)–H(13)      | 0.9300     |
| C(14)–C(15)      | 1.364(5)   |
| C(15)–C(16)      | 1.398(5)   |
| C(15)–H(15)      | 0.9300     |
| C(16)–H(16)      | 0.9300     |
| O(4)–S(1)–O(3)   | 118.50(14) |
| O(4)–S(1)–C(11)  | 107.06(13) |
| O(3)–S(1)–C(11)  | 107.96(13) |
| O(4)–S(1)–C(2)   | 106.22(12) |
| O(3)–S(1)–C(2)   | 106.49(12) |
| C(11)–S(1)–C(2)  | 110.55(12) |
| C(1)–O(2)–H(2)   | 109.5      |
| C(8)–N(1)–C(10)  | 111.4(2)   |
| C(8)–N(1)–H(1A)  | 111.3(19)  |
| C(10)–N(1)–H(1A) | 108(2)     |
| C(8)–N(1)–H(1B)  | 109.3(19)  |

|                          |             |
|--------------------------|-------------|
| C (10) -N (1) -H (1B)    | 108 (2)     |
| H (1A) -N (1) -H (1B)    | 109.3 (15)  |
| O (1) -C (1) -O (2)      | 123.7 (3)   |
| O (1) -C (1) -C (2)      | 124.0 (3)   |
| O (2) -C (1) -C (2)      | 112.3 (2)   |
| C (1) -C (2) -C (6)      | 112.5 (2)   |
| C (1) -C (2) -C (3)      | 112.5 (2)   |
| C (6) -C (2) -C (3)      | 105.7 (2)   |
| C (1) -C (2) -S (1)      | 109.77 (18) |
| C (6) -C (2) -S (1)      | 105.79 (17) |
| C (3) -C (2) -S (1)      | 110.29 (19) |
| C (4) -C (3) -C (2)      | 105.4 (2)   |
| C (4) -C (3) -H (3A)     | 110.7       |
| C (2) -C (3) -H (3A)     | 110.7       |
| C (4) -C (3) -H (3B)     | 110.7       |
| C (2) -C (3) -H (3B)     | 110.7       |
| H (3A) -C (3) -H (3B)    | 108.8       |
| C (3) -C (4) -C (5)      | 104.3 (2)   |
| C (3) -C (4) -H (4A)     | 110.9       |
| C (5) -C (4) -H (4A)     | 110.9       |
| C (3) -C (4) -H (4B)     | 110.9       |
| C (5) -C (4) -H (4B)     | 110.9       |
| H (4A) -C (4) -H (4B)    | 108.9       |
| C (7) -C (5) -C (9)      | 108.2 (2)   |
| C (7) -C (5) -C (4)      | 114.2 (2)   |
| C (9) -C (5) -C (4)      | 111.8 (2)   |
| C (7) -C (5) -C (6)      | 110.0 (2)   |
| C (9) -C (5) -C (6)      | 110.9 (2)   |
| C (4) -C (5) -C (6)      | 101.6 (2)   |
| C (2) -C (6) -C (5)      | 105.7 (2)   |
| C (2) -C (6) -H (6A)     | 110.6       |
| C (5) -C (6) -H (6A)     | 110.6       |
| C (2) -C (6) -H (6B)     | 110.6       |
| C (5) -C (6) -H (6B)     | 110.6       |
| H (6A) -C (6) -H (6B)    | 108.7       |
| C (8) -C (7) -C (5)      | 113.0 (2)   |
| C (8) -C (7) -H (7A)     | 109.0       |
| C (5) -C (7) -H (7A)     | 109.0       |
| C (8) -C (7) -H (7B)     | 109.0       |
| C (5) -C (7) -H (7B)     | 109.0       |
| H (7A) -C (7) -H (7B)    | 107.8       |
| N (1) -C (8) -C (7)      | 110.0 (2)   |
| N (1) -C (8) -H (8A)     | 109.7       |
| C (7) -C (8) -H (8A)     | 109.7       |
| N (1) -C (8) -H (8B)     | 109.7       |
| C (7) -C (8) -H (8B)     | 109.7       |
| H (8A) -C (8) -H (8B)    | 108.2       |
| C (10) -C (9) -C (5)     | 112.9 (2)   |
| C (10) -C (9) -H (9A)    | 109.0       |
| C (5) -C (9) -H (9A)     | 109.0       |
| C (10) -C (9) -H (9B)    | 109.0       |
| C (5) -C (9) -H (9B)     | 109.0       |
| H (9A) -C (9) -H (9B)    | 107.8       |
| N (1) -C (10) -C (9)     | 110.4 (2)   |
| N (1) -C (10) -H (10A)   | 109.6       |
| C (9) -C (10) -H (10A)   | 109.6       |
| N (1) -C (10) -H (10B)   | 109.6       |
| C (9) -C (10) -H (10B)   | 109.6       |
| H (10A) -C (10) -H (10B) | 108.1       |
| C (16) -C (11) -C (12)   | 121.0 (3)   |
| C (16) -C (11) -S (1)    | 119.4 (2)   |



|                      |           |
|----------------------|-----------|
| C (12)-C (11)-S (1)  | 119.3 (2) |
| C (11)-C (12)-C (13) | 119.8 (3) |
| C (11)-C (12)-H (12) | 120.1     |
| C (13)-C (12)-H (12) | 120.1     |
| C (14)-C (13)-C (12) | 117.8 (3) |
| C (14)-C (13)-H (13) | 121.1     |
| C (12)-C (13)-H (13) | 121.1     |
| C (13)-C (14)-F (1)  | 117.6 (4) |
| C (13)-C (14)-C (15) | 123.7 (3) |
| F (1)-C (14)-C (15)  | 118.7 (3) |
| C (14)-C (15)-C (16) | 118.9 (3) |
| C (14)-C (15)-H (15) | 120.5     |
| C (16)-C (15)-H (15) | 120.5     |
| C (11)-C (16)-C (15) | 118.8 (3) |
| C (11)-C (16)-H (16) | 120.6     |
| C (15)-C (16)-H (16) | 120.6     |

---

## REFERENCES

1. Orbe, J.; Rodriguez, J.A.; Sanchez, J.A.; Salicio, A.; Belzunce, M., Ugarte, A.; Chang, H.C.Y.; Rabal, O.; Oyarzabal, J.; Paramo, J.A. Discovery of a potent and safe pre-clinical candidate, CM-352, for the prevention and treatment of hemorrhage. *J. Med. Chem.*, **2015**, XX, XXXX
